# Supplementary material for: Bacterial promoter repression by DNA looping without protein–protein binding competition
Source: PubMed Central journal article supplement — Nucleic Acids Res. 2014 Mar 5;42(9):5495–504. doi: 10.1093/nar/gku180 (PMC4027209; doi:10.1093/nar/gku180), 2014-03-05
Supplement: supp_gku180_nar-03351-m-2013-File008.pdf [file supp_gku180_nar-03351-m-2013-File008.pdf]

**Supplementary Data:**

Figure S1. Construct design. A. Schematic diagram of repressor and promoter elements and spacing measurements. B. Upper strands of 89.5-bp DNA loop constructs are shown with reference positions underlined in top case. Promoter and operator elements are color-coded as in A. Single operator control cases are indicated by shading.

Figure S2. Construct design. A. Schematic diagram of repressor and promoter elements and spacing measurements. B. Upper strands of 100.5-bp DNA loop constructs are shown with reference positions underlined in top case. Promoter and operator elements are color-coded as in A. Single operator control cases are indicated by shading.

**Table S1: plasmid constructs used to generate reporter episomes**

| <b>89.5 bp repression loop</b>      |          |         |        |        |
|-------------------------------------|----------|---------|--------|--------|
| spacing (a)                         | plasmid  | strains |        |        |
| 38                                  | pJ2093   | BL1139  | BL1140 |        |
| 40                                  | pJ2094   | BL1141  | BL1141 |        |
| 42                                  | pJ2095   | BL1143  | BL1144 |        |
| 44                                  | pJ2089   | BL1145  | BL1146 |        |
| 45                                  | pJ2107   | BL1167  | BL1168 |        |
| 46                                  | pJ2096   | BL1147  | BL1148 |        |
| 47                                  | pJ2108   | BL1169  | BL1170 |        |
| 48                                  | pJ2090   | BL1149  | BL1150 |        |
| 50                                  | pJ2097   | BL1151  | BL1152 |        |
| <b>100.5 bp repression loop</b>     |          |         |        |        |
| spacing (a)                         | plasmid  | strains |        |        |
| 44                                  | pJ2098   | BL1153  | BL1154 |        |
| 45                                  | pJ2110   | BL1171  | BL1172 |        |
| 46                                  | pJ2099   | BL1155  | BL1156 |        |
| 47                                  | pJ2111   | BL1173  | BL1174 |        |
| 48                                  | pJ2102   | BL1181  | BL1182 |        |
| 50                                  | pJ2091   | BL1159  | BL1160 |        |
| 52                                  | pJ2100   | BL1161  | BL1162 |        |
| 54                                  | pJ2092   | BL1163  | BL1164 |        |
| 56                                  | pJ2101   | BL1165  | BL1166 |        |
| <b>Single operator controls (b)</b> |          |         |        |        |
| Loop size (c)                       | operator | plasmid | strain |        |
| 89.5                                | Osym     | pJ2112  | BL1175 | BL1176 |
| 89.5                                | O1       | pJ2113  | BL1177 | BL1178 |
| 100.5                               | Osym     | pJ2114  | BL1157 | BL1158 |
| 100.5                               | O1       | pJ2115  | BL1179 | BL1180 |

(a) Indicates distance in bp from center of O1 to center of UV5 promoter.

(b) Each single operator was based on 48 bp center O1 to center UV5 construct.

(c) Indicates spacing in bp from center of functional operator to center of dead operator.

| <b>Table S2: Quantitative Chromatin Immunoprecipitation</b> |                |               |                 |                |           |                                    |           |                               |           |                |           |
|-------------------------------------------------------------|----------------|---------------|-----------------|----------------|-----------|------------------------------------|-----------|-------------------------------|-----------|----------------|-----------|
| <b>89.5 bp repression loop</b>                              |                |               | <b>IgG</b>      |                |           | <b>RNA pol <math>\alpha</math></b> |           | <b><math>\sigma</math> 70</b> |           | <b>LacI</b>    |           |
| <b>spacing (a)</b>                                          | <b>plasmid</b> | <b>strain</b> | <b>IPTG (b)</b> | <b>average</b> | <b>sd</b> | <b>average</b>                     | <b>sd</b> | <b>average</b>                | <b>sd</b> | <b>average</b> | <b>sd</b> |
| 42                                                          | pJ2095         | BL1144        | -               | 0.015          | 0.012     | 0.124                              | 0.059     | 0.256                         | 0.064     | 0.252          | 0.084     |
|                                                             |                |               | +               | 0.016          | 0.005     | 0.181                              | 0.019     | 0.361                         | 0.106     | 0.068          | 0.023     |
| 45                                                          | pJ2107         | BL1167        | -               | 0.017          | 0.004     | 0.169                              | 0.080     | 0.225                         | 0.078     | 0.134          | 0.037     |
|                                                             |                |               | +               | 0.021          | 0.007     | 0.200                              | 0.121     | 0.359                         | 0.158     | 0.156          | 0.040     |
| 50                                                          | pJ2097         | BL1151        | -               | 0.015          | 0.004     | 0.190                              | 0.137     | 0.292                         | 0.117     | 0.313          | 0.151     |
|                                                             |                |               | +               | 0.020          | 0.013     | 0.173                              | 0.077     | 0.449                         | 0.141     | 0.078          | 0.031     |
| Osym (48)                                                   | pJ2112         | BL1175        | -               | 0.022          | 0.004     | 0.329                              | 0.071     | 0.588                         | 0.173     | 0.277          | 0.100     |
|                                                             |                |               | +               | 0.030          | 0.020     | 0.807                              | 0.175     | 1.314                         | 0.422     | 0.061          | 0.007     |
| O1 alone                                                    | pJ2113         | BL1177        | -               | 0.022          | 0.014     | 0.562                              | 0.149     | 1.664                         | 0.544     | 0.379          | 0.190     |
|                                                             |                |               | +               | 0.018          | 0.009     | 0.634                              | 0.151     | 1.366                         | 0.347     | 0.045          | 0.022     |

Data report fraction of input DNA co-precipitated with the indicated antibody.  
(a) Indicates distance in bp from center of O1 to center of UV5 promoter.  
(b) Indicates presence or absence of 2 mM IPTG

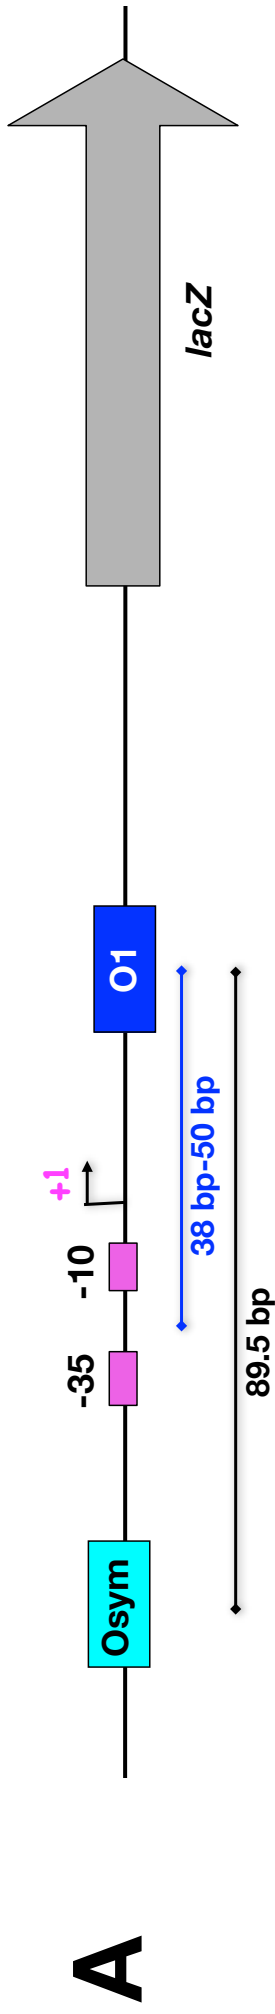

**B**

|                                                                                                                       | spacing   | plasmid | strain        |
|-----------------------------------------------------------------------------------------------------------------------|-----------|---------|---------------|
| AATTGTGAGCGGCTCACAAATTGGATCCTAATCTATAGACGACTCAGATTACACCTTTATGCTTCCGGCTCGTATAATGTGTCGACCCGGGCAATTGTGACGGGATAACAAATTT   | 38        | pJ2093  | BL1139 BL1140 |
| AATTGTGAGCGGCTCACAAATTGGATCCTAATCTATAGACGACTCAGATTACACCTTTATGCTTCCGGCTCGTATAATGTGTCGACCCGAGGGCAATTGTGACGGGATAACAAATTT | 40        | pJ2094  | BL1141 BL1141 |
| AATTGTGAGCGGCTCACAAATTGGATCCTAATCTATAGACTCAGATTACACCTTTATGCTTCCGGCTCGTATAATGTGTCGACCCGATAGGGCAATTGTGACGGGATAACAAATTT  | 42        | pJ2095  | BL1143 BL1144 |
| AATTGTGAGCGGCTCACAAATTGGATCCTAATPACGACTCAGATTACACCTTTATGCTTCCGGCTCGTATAATGTGTCGACCCGCTATAGGGCAATTGTGACGGGATAACAAATTT  | 44        | pJ2089  | BL1145 BL1146 |
| AATTGTGAGCGGCTCACAAATTGGATCCTAATPAGACTCAGATTACACCTTTATGCTTCCGGCTCGTATAATGTGTCGACCCGCTATAGGGCAATTGTGACGGGATAACAAATTT   | 45        | pJ2107  | BL1167 BL1168 |
| AATTGTGAGCGGCTCACAAATTGGATCCTAATGACTCAGATTACACCTTTATGCTTCCGGCTCGTATAATGTGTCGACCCGCTATAGACGGCAATTGTGACGGGATAACAAATTT   | 46        | pJ2096  | BL1147 BL1148 |
| AATTGTGAGCGGCTCACAAATTGGATCCTAATGCTCAGATTACACCTTTATGCTTCCGGCTCGTATAATGTGTCGACCCGCTATAACGAGGCAATTGTGACGGGATAACAAATTT   | 47        | pJ2108  | BL1169 BL1170 |
| AATTGTGAGCGGCTCACAAATTGGATCCTAATCTCAGATTACACCTTTATGCTTCCGGCTCGTATAATGTGTCGACCCGCTATAGACGAGGCAATTGTGACGGGATAACAAATTT   | 48        | pJ2090  | BL1149 BL1150 |
| AATTGTGAGCGGCTCACAAATTGGATCCTAATCTCAGATTACACCTTTATGCTTCCGGCTCGTATAATGTGTCGACCCATAGGAGCTCTGGCCGAACTACATCCTCCGCTAGGT    | 48 (Osym) | pJ2112  | BL1175 BL1176 |
| ACCTCGAGCTCAACGGCAATTGGATCCTAATCTCAGATTACACCTTTATGCTTCCGGCTCGTATAATGTGTCGACCCGCTATAGACGAGGCAATTGTGACGGGATAACAAATTT    | 48 (O1)   | pJ2113  | BL1177 BL1178 |
| AATTGTGAGCGGCTCACAAATTGGATCCTAATCAGATTACACCTTTATGCTTCCGGCTCGTATAATGTGTCGACCCGCTATAGACGACTGGCAATTGTGACGGGATAACAAATTT   | 50        | pJ2097  | BL1151 BL1152 |

figure S1

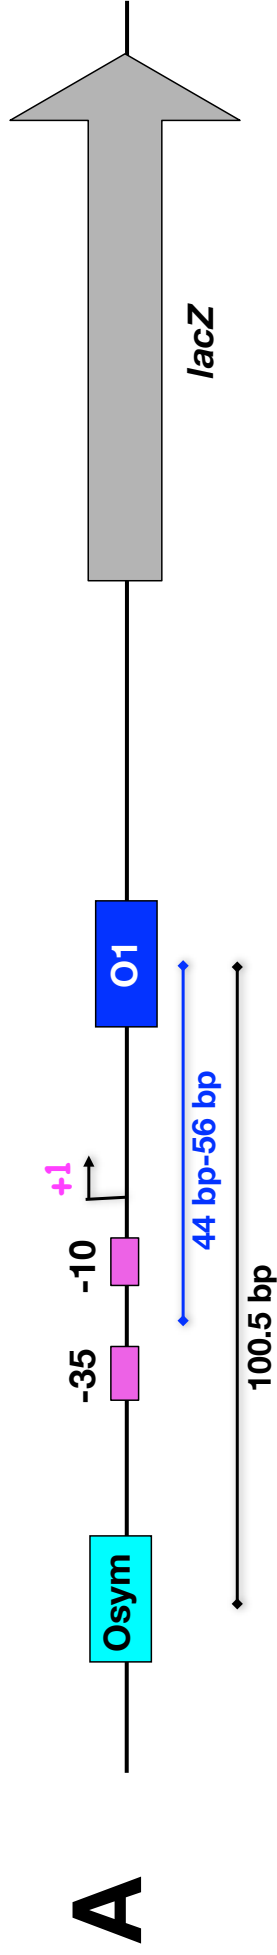

**B**

|                                                                                                                                      | spacing   | plasmid | strain        |
|--------------------------------------------------------------------------------------------------------------------------------------|-----------|---------|---------------|
| AAATTGTGAGCGCTCACAAATGGGATCCTTAATCCCGGGACTATAGAGACTCATTTTACACTTTTATGCTTCCGGCTCGTATAAATGTFTCGACCGAGCTCTGGCAATTTGTGAGCGGGATAACAATT     | 44        | pJ2098  | BL1153 BL1154 |
| AAATTGTGAGCGCTCACAAATGGGATCCTTAATCCCGGGACTATGACGACTCATTTTACACTTTTATGCTTCCGGCTCGTATAAATGTFTCGACCGAGCTCTGGCAATTTGTGAGCGGGATAACAATT     | 45        | pJ2110  | BL1171 BL1172 |
| AAATTGTGAGCGCTCACAAATGGGATCCTTAATCCCGGGACTATACGACTCATTTTACACTTTTATGCTTCCGGCTCGTATAAATGTFTCGACCGAGGCTCTGGCAATTTGTGAGCGGGATAACAATT     | 46        | pJ2099  | BL1155 BL1156 |
| AAATTGTGAGCGCTCACAAATGGGATCCTTAATCCCGGGACTAACGACTCATTTTACACTTTTATGCTTCCGGCTCGTATAAATGTFTCGACCTGAGAGCTCTGGCAATTTGTGAGCGGGATAACAATT    | 47        | pJ2111  | BL1173 BL1174 |
| AAATTGTGAGCGCTCACAAATGGGATCCTTAATCCCGGGACTACGACTCATTTTACACTTTTATGCTTCCGGCTCGTATAAATGTFTCGACCATAGGAGCTCTGGCAATTTGTGAGCGGGATAACAATT    | 48        | pJ2102  | BL1157 BL1158 |
| AAATTGTGAGCGCTCACAAATGGGATCCTTAATCCCGGGACTACGACTCATTTTACACTTTTATGCTTCCGGCTCGTATAAATGTFTCGACCGGTATAGCAGGCGGAACTACATCCTCCGGCTAGGT      | 48 (Osym) | pJ2114  | BL1179 BL1180 |
| ACCTCGAGCTCAACGGCAATGGGATCCTTAATCCCGGGACTACGACTCATTTTACACTTTTATGCTTCCGGCTCGTATAAATGTFTCGACCGGTATAGCAGGCGGAACTACATCCTCCGGCTAGGT       | 48 (O1)   | pJ2115  | BL1181 BL1182 |
| AAATTGTGAGCGCTCACAAATGGGATCCTTAATCCCGGGAAAGGACTCATTTTACACTTTTATGCTTCCGGCTCGTATAAATGTFTCGACCCCTATAGGAGCTCTGGCAATTTGTGAGCGGGATAACAATT  | 50        | pJ2091  | BL1159 BL1160 |
| AAATTGTGAGCGCTCACAAATGGGATCCTTAATCCCGGGAGACTCATTTTACACTTTTATGCTTCCGGCTCGTATAAATGTFTCGACCCCTATAGCAGGCTCTGGCAATTTGTGAGCGGGATAACAATT    | 52        | pJ2100  | BL1161 BL1162 |
| AAATTGTGAGCGCTCACAAATGGGATCCTTAATCCCGGGACTCATTTTACACTTTTATGCTTCCGGCTCGTATAAATGTFTCGACCCCTATAGACGAGCTCTGGCAATTTGTGAGCGGGATAACAATT     | 54        | pJ2092  | BL1163 BL1164 |
| AAATTGTGAGCGCTCACAAATGGGATCCTTAATCCCGGGACTCATTTTACACTTTTATGCTTCCGGCTCGTATAAATGTFTCGACCCCTATAGACGACTGAGCTCTGGCAATTTGTGAGCGGGATAACAATT | 56        | pJ2101  | BL1165 BL1166 |

figure S2
